# Supplementary material for: Quantification of Citrullinated Histone H3 Bound DNA for Detection of Neutrophil Extracellular Traps
Source: MDPI journal article supplement (doi:10.3390/cancers12113424), 2020-11-18
Supplement: s1 [file s1]

## Supplementary Materials:

# Quantification of Citrullinated Histone H3 Bound DNA for Detection of Neutrophil Extracellular Traps

Marina Li, Cindy Lin, Aubrey Leso and Yulia Nefedova

Figure 2a

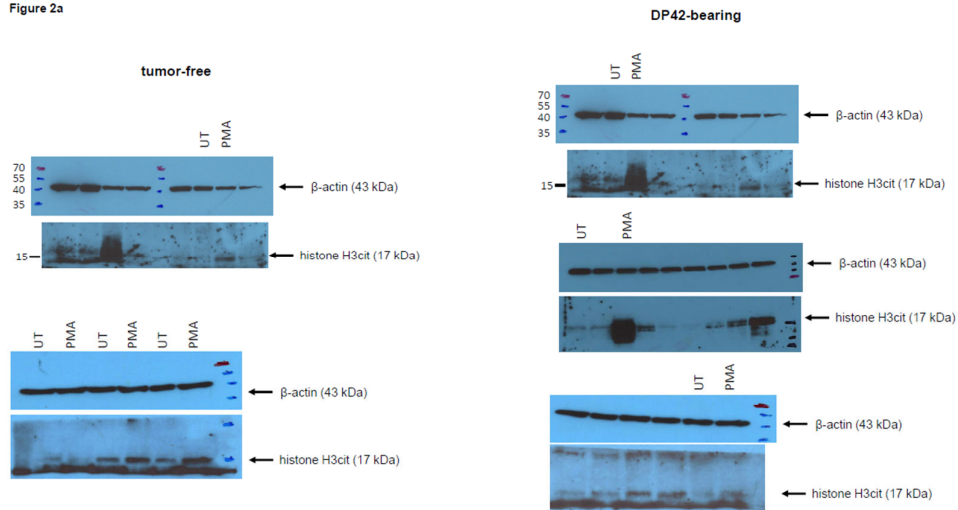

Figure 2b

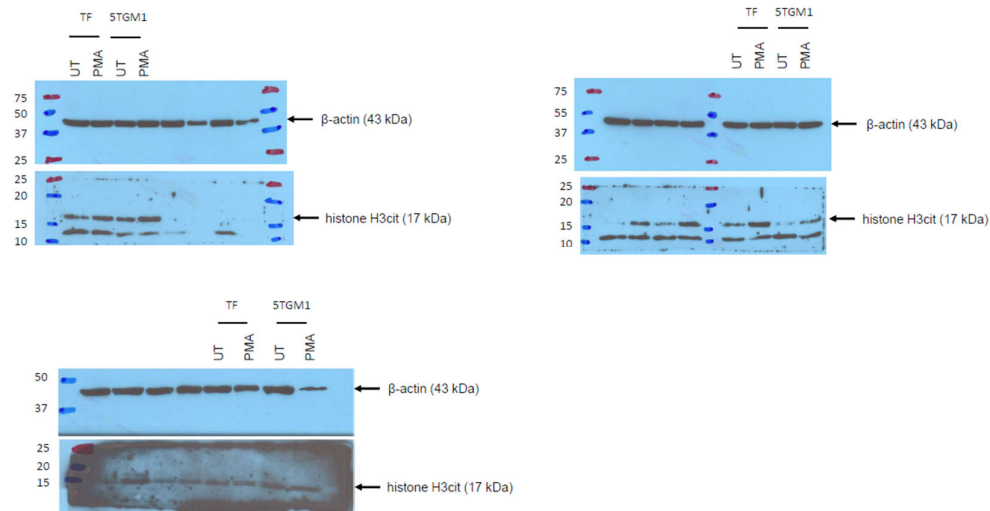

**Figure S1.** Evaluation of histone H3cit in PMA-stimulated neutrophils. Neutrophils were isolated from the BM of DP42 myeloma-bearing or control tumor-free mice or 5TGM1-bearing or tumor-free (TF) mice and left untreated (UT) or stimulated with 200 nM PMA for 4 h. Cells were then collected and subjected to Western blotting with antibodies against citrullinated histone H3. Equal loading was confirmed by re-probing membranes with antibodies against  $\beta$ -actin.
